# Supplementary material
Source: Elsevier journal article supplement (https://www.sciencedirect.com/science/article/pii/S1885585720300591)
Supplement: mmc1 [file mmc1.pdf]

## **MATERIAL ADICIONAL**

### **MÉTODOS**

#### **El Instituto Nacional de Estadística**

Los datos sobre tasa de muerte anual para una determinada edad, sexo y Región pueden ser consultados en la página web del Instituto Nacional de Estadística <sup>1</sup>

El Instituto Nacional de Estadística es un organismo autónomo adscrito al Ministerio de Economía y Empresa de España a través de la Secretaría de Estado de Economía y Apoyo a la Empresa. Se rige por la Ley 12/1989, de 9 de mayo, de la Función Estadística Pública, que regula la actividad estadística para fines estatales la cual es competencia exclusiva del Estado, y por el Estatuto aprobado por Real Decreto 508/2001 de 11 de mayo.

La Ley asigna al Instituto Nacional de Estadística un papel básico y fundamental en la actividad estadística pública encomendándole expresamente la realización oficial de las operaciones estadísticas de gran envergadura e importancia como censos demográficos y económicos, estadísticas demográficas y sociales, tasas de incidencia de mortalidad, indicadores económicos formación del censo electoral etc.<sup>2</sup>. La información otorgada por tanto es de la más alta calidad.

Nuestra región, situada en el norte de España, tiene una población ligeramente superior al millón de habitantes. Nuestro centro es un hospital terciario de referencia para múltiples patologías. Es el único centro implantador TAVI en nuestra Región y al que se derivan todos los pacientes residentes en este territorio que requieren TAVI.

### **RESULTADOS**

A pesar de las diferentes definiciones utilizadas y rangos de edad, en la tabla 1 del material adicional se presentan algunos datos descriptivos sobre la prevalencia de ciertas comorbilidades en España.

**Tabla 1 del material adicional**

Prevalencia de algunas comorbilidades en la población general frecuentes en pacientes con estenosis aórtica grave.

| Variable                                | Edad       | Sexo    | Prevalencia |
|-----------------------------------------|------------|---------|-------------|
| Insuficiencia cardíaca <sup>3</sup>     | > 75 años  | Global  | 8,5%        |
| IAM previo <sup>4</sup>                 | 75-84 años | Varones | 3,9%        |
|                                         |            | Mujeres | 1,6%        |
|                                         | > 84 años  | Varones | 6,2%        |
|                                         |            | Mujeres | 1,8%        |
| Diabetes <sup>5</sup>                   | > 70 años  | Global  | 24%         |
| EPOC <sup>6</sup>                       | 40-70 años | Global  | 9,1%        |
| Dislipemia <sup>7</sup>                 | 65-74 años | Global  | 31%-59%     |
| Hipertensión <sup>7</sup>               | 65-74 años | Global  | 44% - 72%   |
| Accidente cerebro-vascular <sup>8</sup> | 75-79 años | Global  | 3-11%       |
|                                         | 80-84 años | Global  | 4-13%       |
|                                         | 85-90 años | Global  | 6-15%       |

IAM: infarto agudo de miocardio; EPOC: enfermedad pulmonar obstructiva crónica

## FIGURAS

### Figura 1 del material adicional

Curvas de supervivencias estratificadas por edades (75-85 y > 85 años) comparadas con sus poblaciones de referencia. Las curvas se construyeron con toda la muestra.

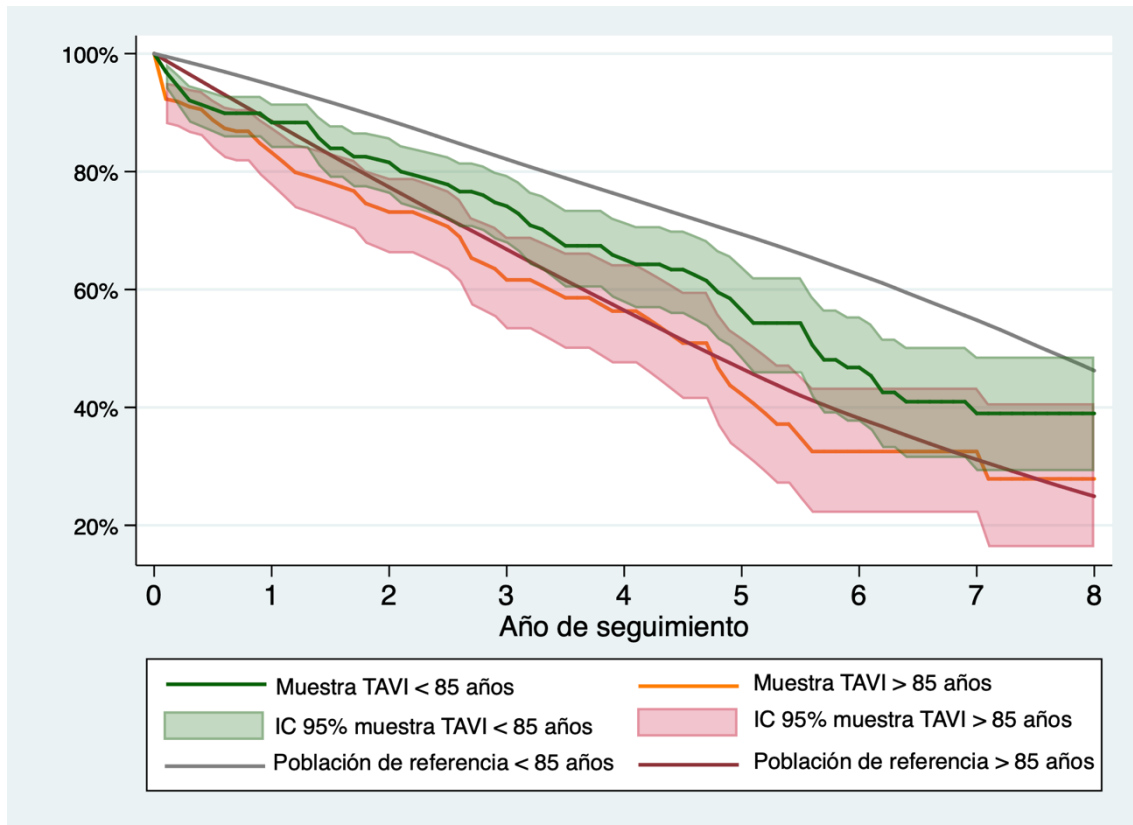

IC95%: intervalo de confianza del 95%; TAVI: implante percutáneo de válvula aórtica.

### Figura 2 del material adicional

Curvas de supervivencias estratificadas por edades (75-85 y > 85 años) comparadas con sus poblaciones de referencia. Las curvas se construyeron solo con aquellos pacientes que sobrevivieron al periodo posoperatorio.

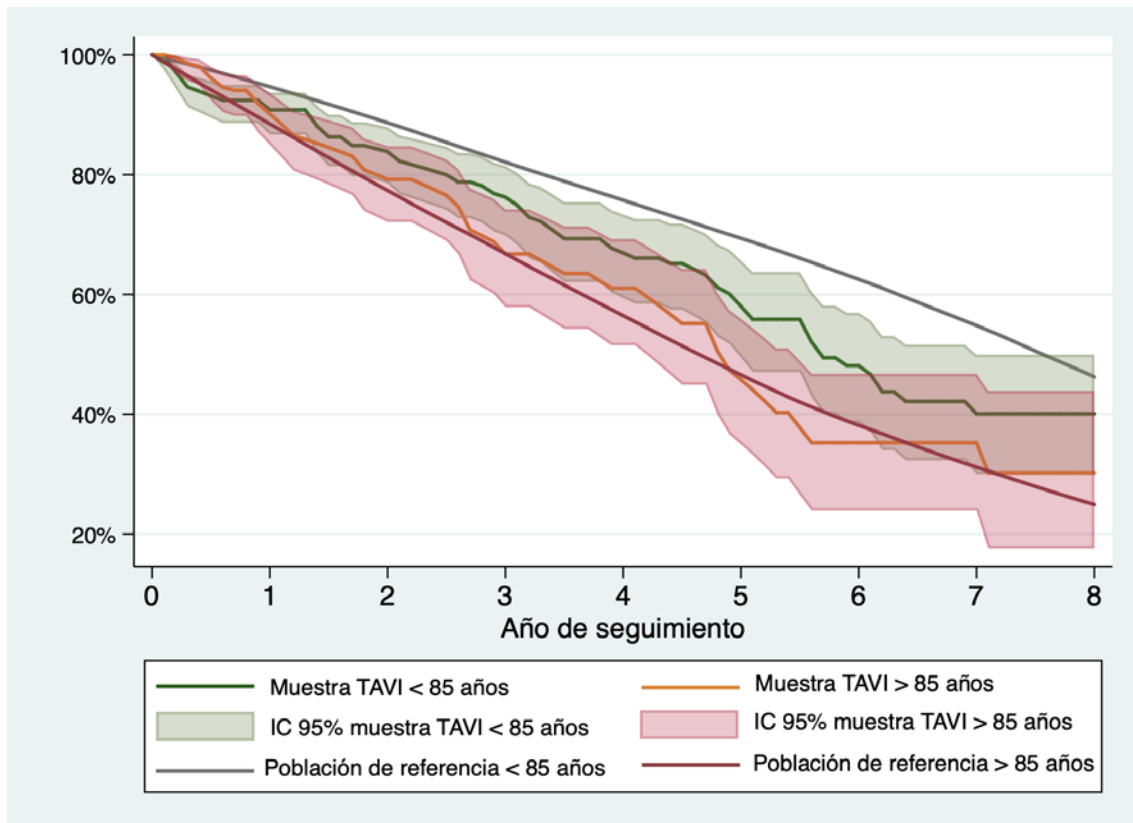

IC95%: intervalo de confianza del 95%; TAVI: implante percutáneo de válvula aórtica.

### Figura 3 del material adicional

Curvas de supervivencia estratificadas por riesgo postoperatorio alto (EuroSCORE 2 > 8) o no (EuroSCORE 2 < 8) y comparadas con sus poblaciones de referencia. Las curvas se construyeron solo con aquellos pacientes que sobrevivieron al periodo posoperatorio.

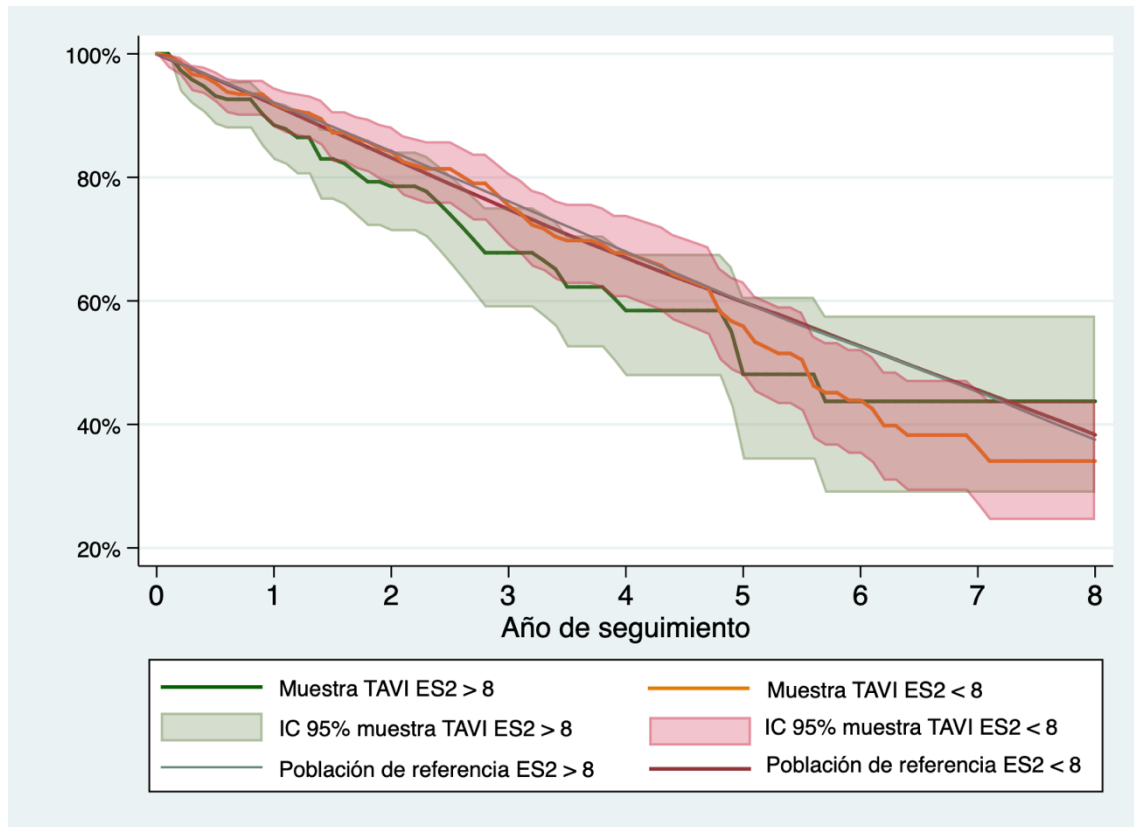

ES2: EuroSCORE 2; IC95%: intervalo de confianza del 95%; TAVI: implante percutáneo de válvula aórtica.

## BIBLIOGRAFÍA

1. Instituto Nacional de Estadística. Madrid, España. Disponible en:  
<http://www.ine.es/jaxiT3/Tabla.htm?t=27154>. Consultado 31 Oct 2019.
2. Instituto Nacional de Estadística. Madrid, España. Disponible en:  
[http://www.ine.es/ss/Satellite?L=es\\_ES&c=Page&cid=1254735910183&p=1254735910183&pagename=INE%2FINELayout](http://www.ine.es/ss/Satellite?L=es_ES&c=Page&cid=1254735910183&p=1254735910183&pagename=INE%2FINELayout). Consultado 31 Oct 2019.
3. Sayago-Silva I, García-López F, Segovia-Cubero J. Epidemiology of heart failure in Spain over the last 20 years. *Rev Esp Cardiol*. 2013;66:649-656.
4. Ferreira-González I. The epidemiology of coronary heart disease. *Rev Esp Cardiol*. 2014;67:139-144.
5. Goday A [Epidemiology of diabetes and its non-coronary complications]. *Rev Esp Cardiol*. 2002;55:657-670.
6. Soriano J, Miravittles M. Datos epidemiológicos de EPOC en España. *Arch Bronconeumol*. 2007;43 Supl 1:2-9.
7. Grau M, Elosua R, Cabrera de León A, et al. Factores de riesgo cardiovascular en España en la primera década del siglo Xxi : análisis agrupado con datos individuales de 11 estudios de base poblacional, estudio DARIOS. *Rev Esp Cardiol*. 2011;64:295-304.
8. Boix R, del Barrio JL, Saz P, et al. Stroke prevalence among the Spanish elderly: an analysis based on screening surveys. *BMC Neurol*. 2006;6:36.
